RESEARCH PAPER

# Diversity of CO<sub>2</sub>-concentrating mechanisms and responses to CO<sub>2</sub> concentration in marine and freshwater diatoms

Romain Clement<sup>1</sup>, Erik Jensen<sup>1</sup>, Laura Prioretti<sup>1</sup>, Stephen C. Maberly<sup>2</sup> and Brigitte Gontero<sup>1,\*</sup>

<sup>1</sup> Aix Marseille Univ, CNRS, BIP, UMR 7281, IMM, 31 Chemin J. Aiguier, 13 402 Marseille Cedex 20, France

<sup>2</sup> Lake Ecosystems Group, Centre for Ecology & Hydrology, Lancaster Environment Centre, Library Avenue, Bailrigg, Lancaster LA1 4AP UK

\* Correspondence: [bmeunier@imm.cnrs.fr](mailto:bmeunier@imm.cnrs.fr)

Received 10 November 2016; Editorial decision 19 January 2017; Accepted 19 January 2017

Editor: Howard Griffiths, University of Cambridge

## Abstract

The presence of CO<sub>2</sub>-concentrating mechanisms (CCMs) is believed to be one of the characteristics that allows diatoms to thrive in many environments and to be major contributors to global productivity. Here, the type of CCM and the responses to variable CO<sub>2</sub> concentration were studied in marine and freshwater diatoms. At 400 ppm, there was a large diversity in physiological and biochemical mechanisms among the species. While *Phaeodactylum tricornutum* mainly used HCO<sub>3</sub><sup>-</sup>, *Thalassiosira pseudonana* mainly used CO<sub>2</sub>. Carbonic anhydrase was an important component of the CCM in all species and C<sub>4</sub> metabolism was absent, even with *T. weissflogii*. For all species, at 20 000 ppm, the affinity for dissolved inorganic carbon was lower than at 400 ppm CO<sub>2</sub> and the reliance on CO<sub>2</sub> was higher. Despite the difference in availability of inorganic carbon in marine and fresh waters, there were only small differences in CCMs between species from the two environments, and *Navicula pelliculosa* behaved similarly when grown in the two environments. The results suggest that species-specific differences are great, and more important than environmental differences in determining the nature and effectiveness of the CCM in diatoms.

**Key words:** Bicarbonate use, carbonic anhydrase, C<sub>4</sub> photosynthesis, carbon dioxide-concentrating mechanism, CCM, diatoms, PEP carboxylase, pH-drift, photosynthesis, PPDK, Rubisco.

## Introduction

Diatoms currently contribute about 50% of the phytoplankton primary production in the oceans and are found in all aquatic environments (Armbrust, 2009). They evolved about 250 to 190 Mya (Sorhannus, 2007; Medlin, 2016) and became the most abundant phytoplankton class approximately 100 Mya, replacing green algae and cyanobacteria, which had dominated the oceans until that time (Armbrust, 2009). Their success may be linked to the increase in oceanic sulphate concentration between the Paleozoic and the Mesozoic Eras (270 Mya), and their competitive ability to continue uptake of some key nutrients when sulphate concentrations are high (Prioretti *et al.*, 2016). However, many other adaptations

allow diatoms to out-compete other phytoplankton groups in today's oceans. For instance, the diatom silica cell wall may discourage attack by grazing organisms, regulate sinking rate (Raven and Waite, 2004), and serve as a pH buffer (Ellwood and Hunter, 2000; Milligan and Morel, 2002; Falkowski *et al.*, 2004; Katz *et al.*, 2005). Because of their photophysiology, diatoms are favoured over other phytoplankton groups in environments with fluctuating light, as occurs in non-stratified water columns (Taddei *et al.*, 2016).

In the aquatic environment, various nutrients, including CO<sub>2</sub>, can limit diatom growth. CO<sub>2</sub> concentration has a direct impact on photosynthesis, but also influences other metabolic

pathways such as glycolysis, the Krebs cycle, nitrogen metabolism, and lipid synthesis (Tsuzuki *et al.*, 1990; Levitan *et al.*, 2007; Chiu *et al.*, 2009; Mus *et al.*, 2013; Kustka *et al.*, 2014; Mekhalfi *et al.*, 2014a; Wang *et al.*, 2014). However, evolution has conferred diatoms with the ability to acquire and store nutrients, and particularly carbon dioxide (CO<sub>2</sub>), efficiently and rapidly, which is an ecological advantage in variable environments (Falkowski *et al.*, 2003). In marine and fresh waters, CO<sub>2</sub> concentrations are often too low to saturate the ribulose-1,5-bisphosphate carboxylase-oxygenase (Rubisco), which has an affinity constant for CO<sub>2</sub> of between 23 and 68 μM in diatoms (Badger *et al.*, 1998; Young *et al.*, 2016). Rubisco catalyses the first reaction of the Calvin–Benson–Bassham cycle, where the carboxylation of ribulose-1,5-bisphosphate (RuBP) produces two molecules of 3-phosphoglycerate. However, when the CO<sub>2</sub> concentration is low, Rubisco performs an oxygenation reaction, leading to the production of 2-phosphoglycolate (Bowes *et al.*, 1971), which must be metabolized through the photorespiration (C2) pathway (Anderson, 1971; Ogren, 1984; Sharkey, 1988; Douce and Heldt, 2000). CO<sub>2</sub>-concentrating mechanisms (CCMs) that concentrate CO<sub>2</sub> around Rubisco have evolved to minimize photorespiration and optimize carboxylation (Badger *et al.*, 1998). Diatoms adapted to low CO<sub>2</sub> concentration have active CCMs (Burkhardt *et al.*, 2001; Trimborn *et al.*, 2008, 2009; Hu and Gao, 2009; Wu *et al.*, 2010; Yang and Gao, 2012; Nakajima *et al.*, 2013; Clement *et al.*, 2016).

Two types of CCM can be recognized: a biophysical CCM based on transport of CO<sub>2</sub>/HCO<sub>3</sub><sup>-</sup> and a biochemical CCM based on C<sub>4</sub> photosynthesis or crassulacean acid metabolism (CAM) photosynthesis. Carbonic anhydrases (CAs) that interconvert CO<sub>2</sub> and water into carbonic acid that rapidly dissociates to form HCO<sub>3</sub><sup>-</sup> and protons (CO<sub>2</sub> + H<sub>2</sub>O ↔ H<sub>2</sub>CO<sub>3</sub> ↔ HCO<sub>3</sub><sup>-</sup> + H<sup>+</sup>) play a fundamental role in the biophysical CCMs of cyanobacteria, other eukaryotic algae (Price *et al.*, 1992; Giordano *et al.*, 2005; Badger *et al.*, 2006), and diatoms (Patel and Merrett, 1986; Nimer *et al.*, 1998; Harada *et al.*, 2005; McGinn and Morel, 2008b; Crawford *et al.*, 2011; Matsuda *et al.*, 2011; Tachibana *et al.*, 2011; Hopkinson *et al.*, 2013; Kustka *et al.*, 2014; Samukawa *et al.*, 2014; Clement *et al.*, 2016). CAs are located in many compartments in diatoms (Samukawa *et al.*, 2014) and these locations, as well as their number, vary among species. For instance, in *Thalassiosira pseudonana*, of 13 putative CAs, two (δ and γ) are external (eCAs) and localized at the periplasmic space, while in *Phaeodactylum tricornutum*, which has nine genes encoding CAs, eCAs are absent (Tanaka *et al.*, 2005; Tachibana *et al.*, 2011; Samukawa *et al.*, 2014; Hopkinson *et al.*, 2016). This absence in *P. tricornutum* seems to be compensated for by the presence of CO<sub>2</sub>/HCO<sub>3</sub><sup>-</sup> transporters, one of which has been well characterized (Nakajima *et al.*, 2013).

Some aquatic plants have C<sub>4</sub> and CAM photosynthesis. In these macrophytes, as in C<sub>4</sub> or CAM terrestrial plants, the first carboxylating enzyme is phosphoenolpyruvate carboxylase, which converts phosphoenolpyruvate and HCO<sub>3</sub><sup>-</sup> into oxaloacetate (Sage, 2004). This C<sub>4</sub> syndrome has been found in *Hydrilla verticillata*, *Egeria densa*, and *Ottelia alismoides* (Magnin *et al.*, 1997; Casati *et al.*, 2000; Zhang *et al.*, 2014),

but is not based on two different types of cells (Reiskind and Bowes, 1991; Lara *et al.*, 2002) unlike most, although not all, terrestrial plants (Voznesenskaya *et al.*, 2001, 2002; Freitag and Stichler, 2002). Since C<sub>4</sub> metabolism can occur in a single cell, it is possible that it could occur in diatoms. So far, *T. weissflogii* is the sole diatom species identified where the presence of a C<sub>4</sub> or C<sub>3</sub>–C<sub>4</sub> intermediate photosynthesis seems to occur (Reinfelder *et al.*, 2000, 2004; Roberts *et al.*, 2007). In contrast, in *T. pseudonana* and *P. tricornutum*, the results are rather contradictory. Although there is some evidence for C<sub>4</sub> photosynthesis in these species (Reinfelder *et al.*, 2004; McGinn and Morel, 2008a; Kustka *et al.*, 2014), there is a growing body of work on *T. pseudonana* (Roberts *et al.*, 2007; Raven, 2010; Tanaka *et al.*, 2014; Clement *et al.*, 2016) and *P. tricornutum* (Haimovich-Dayana *et al.*, 2013; Yang *et al.*, 2016) using different approaches that suggest they have C<sub>3</sub> metabolism.

The large heterogeneity of CO<sub>2</sub> concentration strategies within diatoms, including highly diverse values for their Rubisco catalytic constants (Young *et al.*, 2016) and different distributions and numbers of CAs (Samukawa *et al.*, 2014), may be linked to the environmental conditions in their habitats. Our aim in this study was to determine the types of CCMs in different diatoms and whether or not they differ in species from marine and fresh waters. We extended an experimental strategy previously used successfully on *T. pseudonana* (Clement *et al.*, 2016) to other diatoms that live in either oceans, fresh waters, or both. We analysed the photosynthetic performance and the activities of enzymes involved in carbon acquisition and carboxylation, including CAs, Rubisco, and PEPC, in response to low (400 ppm) vs high (20 000 ppm) CO<sub>2</sub> concentration.

## Materials and methods

### Culture conditions

*Thalassiosira pseudonana* Hasle & Heim., strain CCAP 1085/12 (equivalent to CCMP1335), *Phaeodactylum tricornutum*, strain RCC Pt1\_8.6 (equivalent to CCMP2561), *T. weissflogii*, strain CCAP 1085/18, and *Navicula pelliculosa*, strain CCAP 1050/9 were grown in artificial seawater supplemented with F/2+Si medium as described previously (Clement *et al.*, 2016). *Navicula pelliculosa* was also grown in a freshwater medium based on a modified artificial seawater plus F/2+Si medium in which NaCl and KCl were omitted and NaH<sub>2</sub>PO<sub>4</sub>·2H<sub>2</sub>O (0.036 mM) was replaced with KH<sub>2</sub>PO<sub>4</sub> (0.036 mM). *Asterionella formosa*, isolated from Esthwaite Water in the English Lake District (strain BG1, isolated in Spring 2015), and *Aulacoseira granulata* var. *angustissima*, strain CCAP 1002/2, were grown in Diatom Medium as described previously (Mekhalfi *et al.*, 2012) and supplemented with metals (0.077 μM ZnSO<sub>4</sub>, 0.041 μM CuSO<sub>4</sub>, and 0.042 μM CoCl<sub>2</sub>). Cultures were maintained at 16 °C with continuous illumination at 50 μmol photon m<sup>-2</sup> s<sup>-1</sup> photosynthetically active radiation, and constantly shaken at 90 rpm and bubbled with either 400 ppm or 20 000 ppm CO<sub>2</sub> at a gas flow rate of 130 ml min<sup>-1</sup> as described previously (Clement *et al.*, 2016).

### pH-drift experiments

Diatom cells from the exponential phase of growth were collected by centrifugation at 3720 g at 16 °C for 10 min, washed two times with a different medium for marine or freshwater species (see below), and

then diluted in the same medium to give a final cell density of between 200 000 and 5 000 000 cells ml<sup>-1</sup> depending on the species. The medium for marine species was artificial seawater (pH 8) as described by Clement *et al.*, (2016) but with 2.19 instead of 4.39 mM CaCl<sub>2</sub> to minimize calcite precipitation. The medium for *As. formosa* and *Au. granulata* contained 5.8 μM MgSO<sub>4</sub>, 34.4 μM CaCl<sub>2</sub>, 1.3 μM NaCl, and 2.4 μM KCl (pH 8). The medium for *N. pelliculosa* cultivated in freshwater contained 20.8 mM MgSO<sub>4</sub>, 2.19 mM CaCl<sub>2</sub>, 0.88 mM NaCl, and 0.36 mM KCl. All media were supplemented with either 0.4 or 2 mM NaHCO<sub>3</sub>. The cells were transferred to triplicate 15 ml Falcon tubes and placed in an incubator at 16 °C and illuminated continuously by fluorescent tubes producing about 170 μmol photon m<sup>-2</sup> s<sup>-1</sup> photosynthetically active radiation, as described previously (Maberly *et al.*, 2015). pH was measured with a combination pH-electrode (PHEL-GS2, Labbox) and meter (pH201, Hanna Instruments) after 24 h, and then approximately after every 12 h until a maximum pH had been reached. Taking into account all species, the pH-drift experiments lasted between 5 and 47 h. The geometric mean of the maximum pH reached was calculated along with the standard deviation.

#### Kinetics of O<sub>2</sub> evolution

Rates of net photosynthesis were measured as oxygen evolution at pH 7 and pH 8, 16 °C, 200 μmol photon m<sup>-2</sup> s<sup>-1</sup>, and increasing concentrations of NaHCO<sub>3</sub> from 10 to 2000 μM as described previously (Clement *et al.*, 2016). Species grown in seawater were measured in artificial seawater containing 10 mM HEPES. For *As. formosa*, a medium mimicking the Esthwaite Water mineral composition was used (Smith *et al.*, 2002) containing 10 mM HEPES, 5.8 μM MgSO<sub>4</sub>, 34.4 μM CaCl<sub>2</sub>, 1.3 μM NaCl, and 2.4 μM KCl. For *N. pelliculosa* cultivated in freshwater, the medium contained 10 mM HEPES, 20.8 mM MgSO<sub>4</sub>, 4.39 mM CaCl<sub>2</sub>, 0.88 mM NaCl, and 0.36 mM KCl. For *Au. granulata*, the quantity of cells collected was insufficient to perform kinetic experiments. Chlorophyll was measured after extraction in 96% ethanol as previously described (Clement *et al.*, 2016). The kinetic responses at pH 7 and pH 8 were analysed with a model to distinguish between CO<sub>2</sub>- and HCO<sub>3</sub><sup>-</sup>-dependent inorganic carbon uptake (Clement *et al.*, 2016).

#### Protein extraction

Soluble protein extracts were prepared as described previously (Erales *et al.*, 2008; Mekhalfi *et al.*, 2014b) in a 30-mM Tris, 4-mM

EDTA buffer containing 0.1 mM NAD and 1 mM cysteine, pH 7.9. The concentration of soluble proteins in the crude extracts was assayed using the Bradford reagent from Bio-Rad (Hercules, CA, USA), using bovine serum albumin as a standard.

#### Enzyme activities

All enzyme activities were measured from proteins extracted from cells collected in the exponential phase. Rubisco and C<sub>4</sub> enzymes (PEPC, NAD-ME, and PPKK) were tested as described previously (Zhang *et al.*, 2014). CA was assayed spectrophotometrically as described previously (Clement *et al.*, 2016). For *Au. granulata*, the quantity of cells was insufficient to measure enzyme activities.

## Results

### Inorganic carbon uptake capacity

The ability to remove inorganic carbon was measured in diatom cells grown at 400 ppm CO<sub>2</sub> in pH-drift experiments. The maximal pH values at alkalinities of 0.4 and 2 mEq l<sup>-1</sup> are shown in Table 1 together with the corresponding calculated concentrations of total inorganic carbon (C<sub>T</sub>), CO<sub>2</sub>, bicarbonate, and the quotient C<sub>T</sub>/Alk, which represents the proportion of available carbon left at the end of the drift (Maberly and Spence, 1983). There was a diversity in the ability to extract inorganic carbon among species: *Au. granulata* was the least effective and possibly restricted to CO<sub>2</sub> since the minimum CO<sub>2</sub> concentration it could produce was about 0.2 μM, while *N. pelliculosa* and *P. tricornutum* were the most effective species with very low final concentrations of CO<sub>2</sub> (Table 1). Generally, the two freshwater species were less effective than the marine species at alkalinities of both 0.4 and 2.0 mEq l<sup>-1</sup> in terms of C<sub>T</sub>/Alk, and even more so in terms of final concentrations of CO<sub>2</sub> or HCO<sub>3</sub><sup>-</sup>. At both alkalinities, *N. pelliculosa* extracted more inorganic carbon in seawater than in freshwater. The two species of *Thalassiosira* had very similar and relatively low carbon extraction abilities

**Table 1.** Results from pH-drift experiments at two alkalinities (Alk). Values are the maximal pH and the corresponding minimal concentration of total inorganic carbon (C<sub>T</sub>), and CO<sub>2</sub>, HCO<sub>3</sub><sup>-</sup> and the quotient of C<sub>T</sub>/alkalinity. Values are the mean of triplicate experiments with the standard deviation in parentheses. FW, freshwater; SW, seawater.

| Environment                        | Species               | Max pH       | C <sub>T</sub> (μM) | CO <sub>2</sub> (nM) | HCO <sub>3</sub> <sup>-</sup> (μM) | C <sub>T</sub> /Alk |
|------------------------------------|-----------------------|--------------|---------------------|----------------------|------------------------------------|---------------------|
| Alkalinity 0.4 mEq l <sup>-1</sup> |                       |              |                     |                      |                                    |                     |
| FW                                 | <i>As. formosa</i>    | 9.92 (0.12)  | 258 (22)            | 44 (1)               | 167 (31)                           | 0.65 (0.06)         |
| FW                                 | <i>Au. granulata</i>  | 9.49 (0.02)  | 328 (2)             | 193 (25)             | 274 (4)                            | 0.82 (0.01)         |
| FW                                 | <i>N. pelliculosa</i> | 10.22 (0.01) | 200 (2)             | 13 (3)               | 97 (2)                             | 0.50 (0.01)         |
| SW                                 | <i>N. pelliculosa</i> | 10.19 (0.04) | 138 (7)             | 1 (0.7)              | 10 (1)                             | 0.35 (0.02)         |
| SW                                 | <i>P. tricornutum</i> | 10.03 (0.03) | 161 (5)             | 1 (0.01)             | 17 (2)                             | 0.40 (0.01)         |
| SW                                 | <i>T. pseudonana</i>  | 9.59 (0.03)  | 208 (3)             | 11 (0.7)             | 50 (3)                             | 0.52 (0.01)         |
| SW                                 | <i>T. weissflogii</i> | 9.67 (0.02)  | 200 (1)             | 8 (0.3)              | 41 (1)                             | 0.50 (0.00)         |
| Alkalinity 2.0 mEq l <sup>-1</sup> |                       |              |                     |                      |                                    |                     |
| FW                                 | <i>As. formosa</i>    | 10.49 (0.01) | 1095 (7)            | 26 (1)               | 370 (9)                            | 0.55 (0.00)         |
| FW                                 | <i>Au. granulata</i>  | 9.93 (0.03)  | 1441 (19)           | 237 (25)             | 931 (34)                           | 0.72 (0.01)         |
| FW                                 | <i>N. pelliculosa</i> | 10.45 (0.02) | 1119 (12)           | 31 (3)               | 402 (17)                           | 0.56 (0.01)         |
| SW                                 | <i>N. pelliculosa</i> | 10.33 (0.07) | 930 (18)            | 2 (0.7)              | 50 (8)                             | 0.47 (0.01)         |
| SW                                 | <i>P. tricornutum</i> | 10.34 (0.01) | 930 (2)             | 2 (0.1)              | 50 (1)                             | 0.47 (0.00)         |
| SW                                 | <i>T. pseudonana</i>  | 9.99 (0.02)  | 1013 (3)            | 10 (0.7)             | 113 (4)                            | 0.51 (0.00)         |
| SW                                 | <i>T. weissflogii</i> | 9.99 (0.01)  | 1013 (1)            | 10 (0.3)             | 113 (1)                            | 0.51 (0.00)         |



while *N. pelliculosa* and *P. tricornutum* were the most effective at removing inorganic carbon. The alkalinity of the test medium did not have a large effect on the final concentration of CO<sub>2</sub> at the end of a drift.

### Carbon uptake kinetics

The maximal rates of net photosynthesis ( $V_{\text{net}}^{\text{max}}$ ) in diatoms grown at 400 ppm CO<sub>2</sub> measured at pH 7 were similar to those obtained at pH 8 for all species except for *As. formosa* where  $V_{\text{net}}^{\text{max}}$  was higher at pH 7 than at pH 8 ( $P < 0.05$ ; Table 2). In contrast, in cells grown at 20 000 ppm, rates at pH 7 were greater than at pH 8 for *As. formosa* ( $P < 0.001$ ), *P. tricornutum* ( $P < 0.05$ ), and *T. pseudonana* ( $P < 0.001$ ). When cells were tested at pH 7,  $V_{\text{net}}^{\text{max}}$  was not different at 400 vs 20 000 ppm for *T. weissflogii*, but was greater at 20 000 ppm for *As. formosa* ( $P < 0.001$ ), *N. pelliculosa* in freshwater ( $P < 0.05$ ), *P. tricornutum* ( $P < 0.05$ ), and *T. pseudonana* ( $P < 0.001$ ). In *N. pelliculosa* in seawater the rate was greater at 400 than at 20 000 ppm. When cells were tested at pH 8,  $V_{\text{net}}^{\text{max}}$  rates were greater at 20 000 ppm for *As. formosa* ( $P < 0.01$ ), and greater at 400 ppm for *N. pelliculosa* in seawater ( $P < 0.05$ ) and *T. pseudonana* ( $P < 0.05$ ).

The half-saturation constants ( $K_{1/2}$ ) for dissolved inorganic carbon (DIC) at pH 7 compared to pH 8 were lower or significantly different for all species and growth conditions except for *N. pelliculosa* in freshwater and *T. pseudonana* at high CO<sub>2</sub> (Table 2). Moreover, at 20 000 ppm, the  $K_{1/2}$  values were higher than those at 400 ppm at both pH 7 and 8, in agreement with CCM induction at low CO<sub>2</sub>. In general, there were no differences in  $K_{1/2}$  for DIC for marine and freshwater species, although the two species of *Thalassiosira* had the lowest  $K_{1/2}$  at pH 7 and 400 ppm of any species.

The different kinetic parameters measured at pH 7 and pH 8 are consistent with the different proportions of CO<sub>2</sub> and HCO<sub>3</sub><sup>-</sup> present at these two pH values. We therefore used these data to calculate CO<sub>2</sub> and HCO<sub>3</sub><sup>-</sup> uptake, as described previously (Clement et al., 2016). The models fitted the data well, with average  $R^2$  values for the biological replicates of between 0.92 and 0.99 (Table 3) apart from one previously published data set on *T. pseudonana*

(Clement et al., 2016). The modelled CO<sub>2</sub> compensation point was zero throughout, consistent with a very high affinity for this form of inorganic carbon, as was also indicated in the pH-drift experiments. All species grown at 400 ppm had a low  $K_{1/2}$  for CO<sub>2</sub> (Table 3, Fig. 1). *Phaeodactylum tricornutum* grown at 400 ppm had a capacity to take up CO<sub>2</sub> that was about 10-times lower than all the other species but had a very high CO<sub>2</sub> affinity (Table 3). There appeared to be two groups of species with different abilities to use HCO<sub>3</sub><sup>-</sup>: *N. pelliculosa* regardless of the growth medium and *P. tricornutum* with very high uptake capacities, and the other three species with approximately a five-times lower maximal rate. The CO<sub>2</sub> as well as the HCO<sub>3</sub><sup>-</sup> kinetics for *N. pelliculosa* were similar in freshwater and seawater (Fig. 1B). At ambient concentrations of CO<sub>2</sub> (~16 μM for cells grown at 400 ppm and ~800 μM for cells grown at 20 000 ppm) and HCO<sub>3</sub><sup>-</sup> (400 μM in freshwater and 2000 μM in seawater), *P. tricornutum* relied almost entirely on HCO<sub>3</sub><sup>-</sup> while in contrast *As. formosa* and the two species of *Thalassiosira* relied on CO<sub>2</sub> more than HCO<sub>3</sub><sup>-</sup> when these species were grown at 400 ppm (Fig. 1C).

There were substantial differences in CO<sub>2</sub> and HCO<sub>3</sub><sup>-</sup> uptake kinetics in cells grown at 20 000 rather than 400 ppm. The  $K_{1/2}$  value for CO<sub>2</sub> was 1.5- to 70-fold higher at 20 000 compared to 400 ppm; the  $K_{1/2}$  value for *N. pelliculosa* grown in seawater changed least and the value for *P. tricornutum* changed most. When grown at 20 000 ppm, the form of inorganic carbon taken up by *P. tricornutum* switched remarkably from HCO<sub>3</sub><sup>-</sup> to CO<sub>2</sub> (Fig. 1C, F). Regardless of the growth medium, *N. pelliculosa* used HCO<sub>3</sub><sup>-</sup> and CO<sub>2</sub> to a similar extent at both 20 000 ppm (roughly 50% HCO<sub>3</sub><sup>-</sup>), and 400 ppm (roughly 60% HCO<sub>3</sub><sup>-</sup>). The uptake of CO<sub>2</sub> and HCO<sub>3</sub><sup>-</sup> by *As. formosa* was also not strongly affected by the different CO<sub>2</sub> concentrations. As shown previously, *T. pseudonana* relied largely on CO<sub>2</sub> even at 400 ppm, but completely down-regulated its use of HCO<sub>3</sub><sup>-</sup> at 20 000 ppm (Clement et al., 2016). Under ambient conditions the cells grown at 20 000 ppm were almost completely saturated by the available CO<sub>2</sub> and HCO<sub>3</sub><sup>-</sup> (Fig. 1F). However, at 400 ppm CO<sub>2</sub> (~16 μM) these cells would only be between 43% saturated in the case of *As. formosa* and about 80% saturated for the two species of *Thalassiosira* (Fig. 1F).

**Table 2.** Kinetics of photosynthesis for five species of diatoms grown in marine or freshwater, at two CO<sub>2</sub> concentrations and measured at pH 7 or pH 8. Values are the mean of two or three biological replicates and three technical replicates with standard deviation in parentheses.  $K_{1/2}$  DIC, the half-saturation concentration of dissolved inorganic carbon.

| Environment | Species                | Maximum photosynthesis (μmol h <sup>-1</sup> mg <sup>-1</sup> Chl <sub>a</sub> ) |          |          |          | $K_{1/2}$ DIC (μM) |         |        |          |
|-------------|------------------------|----------------------------------------------------------------------------------|----------|----------|----------|--------------------|---------|--------|----------|
|             |                        | pH 7                                                                             |          | pH 8     |          | pH 7               |         | pH 8   |          |
|             |                        | 400                                                                              | 20 000   | 400      | 20 000   | 400                | 20 000  | 400    | 20 000   |
| FW          | <i>As. formosa</i>     | 107 (1)                                                                          | 337 (9)  | 79 (16)  | 159 (11) | 7 (2)              | 55 (30) | 13 (2) | 106 (44) |
| FW          | <i>N. pelliculosa</i>  | 191 (6)                                                                          | 246 (33) | 180 (25) | 195 (30) | 7 (0)              | 57 (37) | 11 (1) | 26 (1)   |
| SW          | <i>N. pelliculosa</i>  | 240 (63)                                                                         | 136 (5)  | 190 (15) | 123 (15) | 7 (1)              | 22 (7)  | 8 (3)  | 64 (11)  |
| SW          | <i>P. tricornutum</i>  | 150 (25)                                                                         | 235 (46) | 159 (20) | 199 (27) | 10 (2)             | 35 (12) | 15 (4) | 279 (62) |
| SW          | <i>T. pseudonana</i> * | 111 (3)                                                                          | 205 (17) | 113 (3)  | 95 (8)   | 4 (1)              | 59 (23) | 15 (2) | 46 (19)  |
| SW          | <i>T. weissflogii</i>  | 127 (15)                                                                         | 122 (23) | 111 (4)  | 106 (10) | 3 (1)              | 20 (11) | 7 (1)  | 105 (17) |

\* Data from (Clement et al., 2016).

**Table 3.** Modelled kinetics of CO<sub>2</sub>-dependent and HCO<sub>3</sub><sup>-</sup>-dependent photosynthesis for five species of diatoms grown in marine or freshwater, at two CO<sub>2</sub> concentrations. Values are means with standard errors of the estimate in parentheses.

| Environment                | Species                | $V_{\text{net}}^{\text{max}}$ ( $\mu\text{mol O}_2 \text{ h}^{-1} \text{ mg}^{-1} \text{ Chla}$ ) |                               | $K_{1/2}$ ( $\mu\text{M}$ ) |                               | CP ( $\mu\text{M}$ ) |                               | Slope ( $\mu\text{mol O}_2 \text{ h}^{-1} \text{ mg}^{-1} \text{ Chla } \mu\text{M}^{-1}$ ) |                               | $R^2$ |
|----------------------------|------------------------|---------------------------------------------------------------------------------------------------|-------------------------------|-----------------------------|-------------------------------|----------------------|-------------------------------|---------------------------------------------------------------------------------------------|-------------------------------|-------|
|                            |                        | CO <sub>2</sub>                                                                                   | HCO <sub>3</sub> <sup>-</sup> | CO <sub>2</sub>             | HCO <sub>3</sub> <sup>-</sup> | CO <sub>2</sub>      | HCO <sub>3</sub> <sup>-</sup> | CO <sub>2</sub>                                                                             | HCO <sub>3</sub> <sup>-</sup> |       |
|                            |                        |                                                                                                   |                               |                             |                               |                      |                               |                                                                                             |                               |       |
| 400 ppm CO <sub>2</sub>    |                        |                                                                                                   |                               |                             |                               |                      |                               |                                                                                             |                               |       |
| FW                         | <i>As. formosa</i>     | 71 (12)                                                                                           | 34 (17)                       | 2.6 (0.9)                   | ND                            | 0.0 (0.0)            | ND                            | 30.0 (14.7)                                                                                 | ND                            | 0.94  |
| FW                         | <i>N. pelliculosa</i>  | 61 (27)                                                                                           | 127 (39)                      | 1.3 (.4)                    | 4.0 (0.9)                     | 0.0 (0.0)            | 3.8 (0.6)                     | 44.8 (8.3)                                                                                  | 31.4 (3.0)                    | 0.97  |
| SW                         | <i>N. pelliculosa</i>  | 107 (2)                                                                                           | 158 (22)                      | 2.6 (0.6)                   | ND                            | 0.0 (0.0)            | ND                            | 42.9 (9.6)                                                                                  | ND                            | 0.94  |
| SW                         | <i>P. tricornutum</i>  | 7 (11)                                                                                            | 151 (18)                      | 0.1 (0.1)                   | 12.0 (1.5)                    | 0.0 (0.0)            | 1.3 (1.3)                     | 129.4 (42.6)                                                                                | 12.7 (2.2)                    | 0.93  |
| SW                         | <i>T. pseudonana</i> * | 85 (9)                                                                                            | 27 (9)                        | 0.4 (0.1)                   | 2.7 (0.4)                     | 0.0 (0.0)            | 7.5 (0.7)                     | 296 (38)                                                                                    | 42 (6)                        | 0.92  |
| SW                         | <i>T. weissflogii</i>  | 101 (16)                                                                                          | 16 (8)                        | 0.1 (0.0)                   | ND                            | 0.0 (0.0)            | ND                            | 1127 (142)                                                                                  | ND                            | 0.94  |
| 20 000 ppm CO <sub>2</sub> |                        |                                                                                                   |                               |                             |                               |                      |                               |                                                                                             |                               |       |
| FW                         | <i>As. formosa</i>     | 310 (27)                                                                                          | 75 (16)                       | 37.6 (14.5)                 | ND                            | 0.0 (0.0)            | ND                            | 8.8 (2.3)                                                                                   | ND                            | 0.92  |
| FW                         | <i>N. pelliculosa</i>  | 129 (1)                                                                                           | 133 (39)                      | 31.5 (5.9)                  | 11.9 (7)                      | 0.0 (0.0)            | 0.0 (0.0)                     | 4.2 (0.7)                                                                                   | 11.9 (7.0)                    | 0.99  |
| SW                         | <i>N. pelliculosa</i>  | 95 (38)                                                                                           | 83 (28)                       | 4.2 (1.5)                   | 11.7 (1.2)                    | 0.0 (0.0)            | 0.0 (0.0)                     | 18.5 (5.2)                                                                                  | 11.7 (1.2)                    | 0.99  |
| SW                         | <i>P. tricornutum</i>  | 201 (45)                                                                                          | 51 (25)                       | 7.4 (2.1)                   | ND                            | 0.0 (0.0)            | ND                            | 28.9 (10.7)                                                                                 | ND                            | 0.98  |
| SW                         | <i>T. pseudonana</i> * | 202 (39)                                                                                          | 0.0 (0.0)                     | 3.8 (0.1)                   | -                             | 0.0 (0.0)            | -                             | 53.0 (9.0)                                                                                  | -                             | 0.60  |
| SW                         | <i>T. weissflogii</i>  | 97 (9)                                                                                            | 29 (24)                       | 4.1 (3.3)                   | 3.2 (5.6)                     | 0.0 (0.0)            | 0.0 (0.0)                     | 35.2 (24.6)                                                                                 | 3.2 (5.6)                     | 0.97  |

\* Data from (Clement et al., 2016).

$V_{\text{net}}^{\text{max}}$ , the maximum rate of net photosynthesis;  $K_{1/2}$ , the half-saturation concentration; CP, the compensation point; Slope, the ratio of  $V_{\text{net}}^{\text{max}}$  to  $K_{1/2}$ ;  $R^2$ , the average coefficient of determination. ND signifies concentrations that were too low to be assessed accurately and consequently slopes could also not be determined. '-' signifies no use of HCO<sub>3</sub><sup>-</sup> and therefore no value is appropriate.

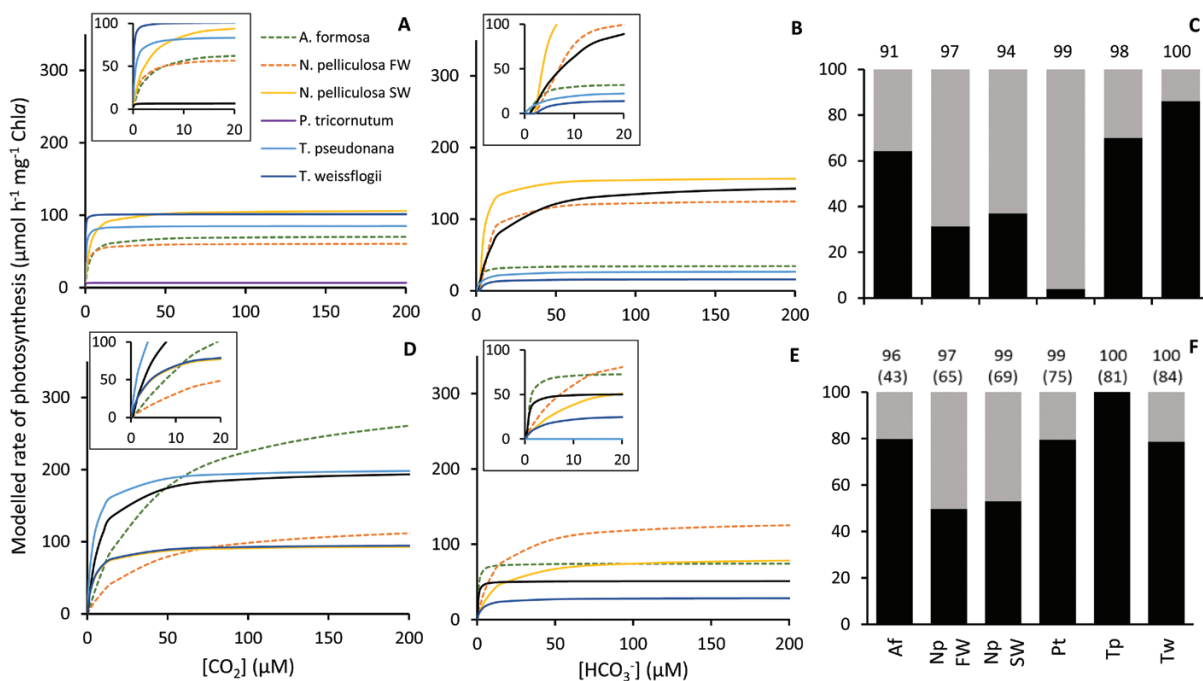

**Fig 1.** Modelled rates of net photosynthesis ( $\mu\text{mol O}_2 \text{ h}^{-1} \text{ mg}^{-1} \text{ Chla}$ ). Rate as a function of CO<sub>2</sub> after growth at 400 ppm (A) or 20 000 ppm CO<sub>2</sub> (D), and as a function of HCO<sub>3</sub><sup>-</sup> concentration after growth at 400 ppm (B) or 20 000 ppm CO<sub>2</sub> (E) are shown. The insets show the model outputs at low concentration. See (A) for the key to species; FW, freshwater; SW, seawater. The proportion (%) of CO<sub>2</sub> (black) and HCO<sub>3</sub><sup>-</sup> (grey) contributing to net photosynthesis under ambient conditions (see text) for cells grown at 400 ppm (C) or 20 000 ppm CO<sub>2</sub> (F). The numbers given in (C) and (F) are the percent of carbon saturation under ambient conditions; in (F) the numbers in parentheses are the values when cells grown at 20 000 ppm were exposed to 400 ppm.

### Enzyme activities

Rubisco, PEPC, NAD-ME, PPKK, and CA activities were measured with proteins extracted from the different diatoms cultured at either 400 ppm or 20 000 ppm CO<sub>2</sub> (Fig. 2). For all diatom species, Rubisco activity was between 1.3- and

1.8-fold higher and was significantly different (Student's *t*-test,  $P < 0.001$ ) in extracts from cells grown at 20 000 ppm vs 400 ppm (Fig. 2A).

Three diatoms, *T. weissflogii*, *N. pelliculosa* grown in freshwater, and *As. formosa*, had a significantly higher PEPC

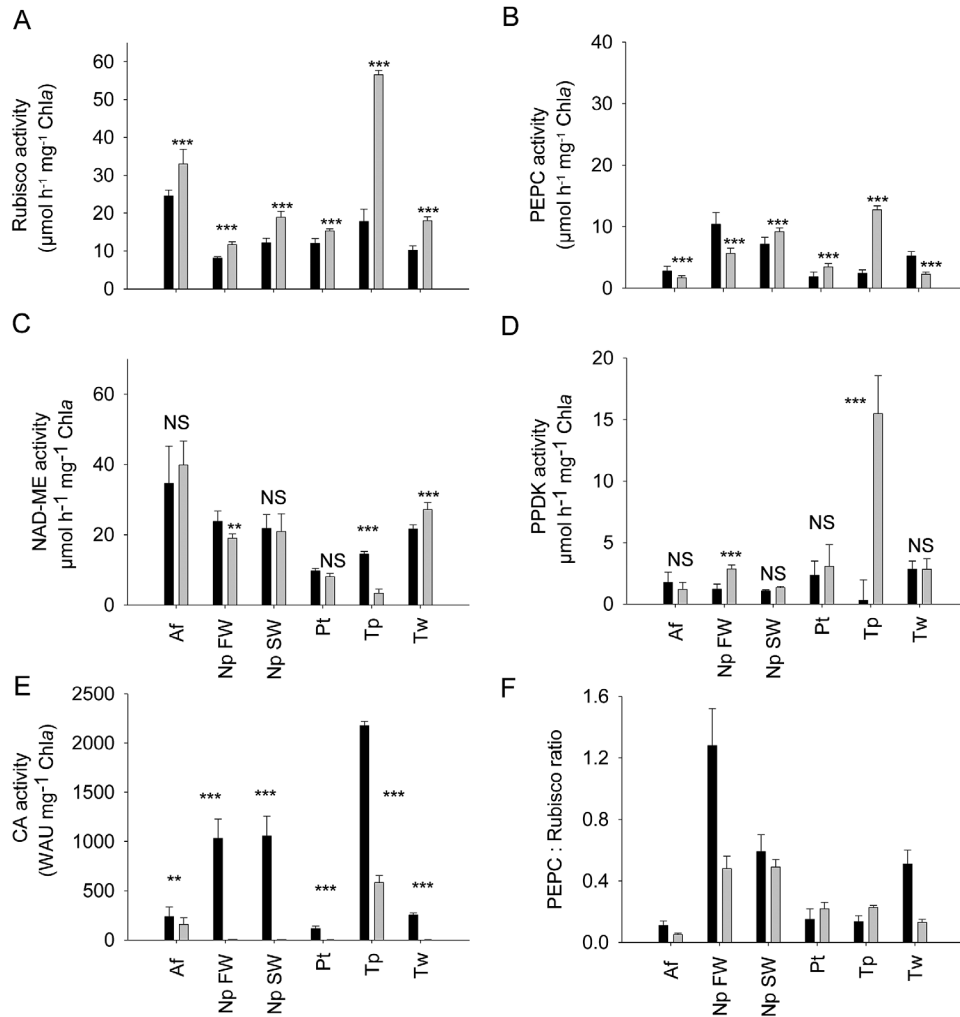

**Fig. 2.** Activities of Rubisco, C<sub>4</sub> enzymes, and carbonic anhydrase (CA) in diatoms grown at 400 ppm CO<sub>2</sub> (black bars) or 20 000 ppm CO<sub>2</sub> (grey bars). Rubisco activity (A), phosphoenolpyruvate carboxylase (PEPC) activity (B), NAD-malic enzyme (NAD-ME) (C), Pyruvate phosphate dikinase (PPDK) (D), and CA activity (E). The ratio of the activities of the two carboxylating enzymes, PEPC:Rubisco (F). Error bars represent the SD. \*\**P*<0.01, \*\*\**P*<0.001, NS stands for not significant (Student's *t*-test). For CA activity, WAU indicates Wilbur–Anderson Units. Af, *As. formosa*; Np FW, *N. pelliculosa* grown in freshwater; Np SW, *N. pelliculosa* grown in seawater; Pt, *P. tricornutum*; Tp, *T. pseudonana*; Tw, *T. weissflogii*.

activity (2.3-, 1.8-, and 1.6-fold, respectively; Student's *t*-test, *P*<0.001) at 400 ppm compared to 20 000 ppm (Fig. 2B). In contrast, *P. tricornutum*, *N. pelliculosa* grown in seawater, and *T. pseudonana* had significantly lower PEPC activity at 400 ppm (1.9-, 1.3-, and 5.3-fold, respectively; Student's *t*-test, *P*<0.001). At 400 ppm, the ratio of PEPC to Rubisco was below 0.6 in most diatoms except for *N. pelliculosa* grown in freshwater, where this ratio was 1.28 (Fig. 2F). NAD-ME activity did not significantly change in *As. formosa*, *P. tricornutum*, and *N. pelliculosa* in seawater regardless of CO<sub>2</sub> concentration (Fig. 2C). However, in *N. pelliculosa* in freshwater a higher activity was measured when grown at 400 ppm compared to 20 000 ppm (1.25-fold; Student's *t*-test, *P*<0.01). In contrast, a slightly higher activity (1.25-fold; Student's *t*-test, *P*<0.01) was measured in *T. weissflogii* at 20 000 ppm compared to 400 ppm. PPDK activity did not significantly change in *As. formosa*, *P. tricornutum*, *T. weissflogii*, and *N. pelliculosa* in seawater regardless of CO<sub>2</sub> concentration. However, in *N. pelliculosa* grown in freshwater, the activity of PPDK was 2.37-fold lower at 400 ppm compared to 20 000 ppm (Student's *t*-test, *P*<0.001) (Fig. 2D).

CA activity was higher in all diatom species grown at 400 ppm vs 20 000 ppm (Student's *t*-test, *P*<0.001 for all species except for *As. formosa*, *P*<0.01; Fig. 2E). CA activity was either not detected or very low at 20 000 ppm in *N. pelliculosa* from both environments, *P. tricornutum*, and *T. weissflogii*. CA activity at 400 ppm varied substantially among diatoms. In *As. formosa*, *P. tricornutum*, and *T. weissflogii* the CA activities were much lower than in *N. pelliculosa* (sea- and freshwater) and *T. pseudonana*.

## Discussion

Diatoms inhabit a wide range of environments and the distribution of diatom taxa is strongly heterogeneous in the oceans (Malviya *et al.*, 2016) and in different freshwaters. In the oceans, the CO<sub>2</sub> concentration rarely falls substantially below 50% of the air-equilibrium concentration (~10 μM; Tortell, 2000; Hofmann *et al.*, 2011). In contrast, productive freshwaters are characterized by very variable CO<sub>2</sub>, with concentrations substantially above or below air-equilibrium (Maberly, 1996). In addition, the HCO<sub>3</sub><sup>-</sup> concentration in the oceans is

high and relatively constant, while it is very variable in different freshwaters (Raven and Maberly, 2004). Therefore diatoms from various habitats were studied to determine whether species from different environments have different capabilities to acquire inorganic carbon.

#### Physiological adaptation

There was a range of carbon-extraction abilities among the diatoms studied. Of the two freshwater species, *As. formosa* was more effective than *Au. granulata*, which agrees with a comparison made between natural populations of *As. formosa* and *Au. subarctica* (then known as *Melosira italica* subsp. *subarctica*) (Talling, 1976). *Navicula pelliculosa* that had been grown in seawater was even more effective (Table 1), and similar to the freshwater *Fragilaria crotonensis*, also studied by Talling (1976). The final pH in drift experiments was greater at the higher alkalinity for each species, suggesting that pH *per se* was not limiting carbon uptake, at least at the lower alkalinity. The very low final CO<sub>2</sub> concentrations generated at the end of a drift (all less than 0.3 μM) suggest that all species, with the possible exception of *Au. granulata*, have a CCM. The final CO<sub>2</sub> concentrations at the end of a drift for the two freshwater species were slightly higher than for the marine species, but the overall amount of inorganic carbon available was similar.

In our study, the affinity ( $K_{1/2}$ ) for DIC varied among diatoms and with CO<sub>2</sub> concentration. In all species, at 400 ppm the  $K_{1/2}$  values for CO<sub>2</sub> were lower than the mean  $K_m$  for diatom Rubisco (Young *et al.*, 2016), further indicating that some form of CCM was present. In all the diatoms studied here, the affinities for DIC and CO<sub>2</sub> were lower for cells grown at 20 000 ppm vs 400 ppm, and this is also the case in all diatom species studied previously (Table 4), showing that the alteration of carbon kinetics in response to variable CO<sub>2</sub> is widespread in these algae. The  $K_{1/2}$  values for CO<sub>2</sub> at 20 000 ppm were within the range reported for the  $K_m$  for diatom Rubisco (Young *et al.*, 2016), indicating that the CCM involved in CO<sub>2</sub> uptake had been completely down-regulated in most species. There is some indication of differences in carbon kinetics between different groups of diatoms (Table 4), but the large variability in values and the relatively few species studied means that more work is required to test this possibility. Despite a much higher HCO<sub>3</sub><sup>-</sup> concentration in the medium, when grown at 400 ppm *As. formosa*, *T. weissflogii*, and *T. pseudonana* preferentially used CO<sub>2</sub>. In contrast, *P. tricornutum* and *N. pelliculosa* grown in freshwater or seawater preferentially used HCO<sub>3</sub><sup>-</sup>. In cells grown at 20 000 ppm, the capacity to use HCO<sub>3</sub><sup>-</sup> or CO<sub>2</sub> was also heterogeneous among species, although CO<sub>2</sub> use became more important. These results are consistent with the diversity of CO<sub>2</sub>/bicarbonate uptake already observed in other diatoms (Trimborn *et al.*, 2009). pH-drift experiments also confirmed a diversity in the ability to exploit DIC at low CO<sub>2</sub> (Talling, 1976).

#### Biochemical adaptation

In diatoms, CA is highly up-regulated at low CO<sub>2</sub> (Trimborn *et al.*, 2009; Crawford *et al.*, 2011; Hopkinson *et al.*, 2013,

2016; Kustka *et al.*, 2014; Clement *et al.*, 2016). Up-regulation of CA activity in low-CO<sub>2</sub> environments was observed for all the species. A 1.5-fold up-regulation of CA was observed in *As. formosa* grown at 400 vs 20 000 ppm, similar to the 4-fold up-regulation observed in *T. pseudonana* (Hopkinson *et al.*, 2013; Clement *et al.*, 2016). However, this is much less than the up-regulation observed in *P. tricornutum* and *T. weissflogii* (around 100-fold), and in *N. pelliculosa* grown in seawater and freshwater (240- and 223-fold, respectively). In *P. tricornutum*, where no external (periplasmic) CA has been found (Hopkinson *et al.*, 2013), CA activity was lower than in *T. pseudonana*. This result is consistent with data from the literature that indicate that in *P. tricornutum* bicarbonate transporters may play a major role in the CCM (Tachibana *et al.*, 2011; Nakajima *et al.*, 2013; Samukawa *et al.*, 2014) and with the preferential use of HCO<sub>3</sub><sup>-</sup> reported here.

In C<sub>4</sub> metabolism, PEPC is expected to be the major carboxylating enzyme and its activity is expected to be higher than that of Rubisco; the ratio of PEPC:Rubisco therefore being greater than 1. In most species, except *N. pelliculosa* grown in freshwater, the activity of Rubisco was higher than the activity of PEPC, and therefore the ratio of PEPC:Rubisco was less than 1, irrespective of whether the cells were grown at low or high CO<sub>2</sub>. These results are therefore not in favour of C<sub>4</sub> photosynthesis, including for *T. weissflogii*. Another criterion for C<sub>4</sub> metabolism is up-regulation, at low vs high CO<sub>2</sub>, of enzymes involved in this type of photosynthesis, such as PEPC, PPDK that regenerates PEPC substrate, and malic enzymes that decarboxylate the C<sub>4</sub> compound to a C<sub>3</sub> compound producing CO<sub>2</sub> that can be fixed in the Calvin–Benson–Bassham cycle. In this study, NAD-ME, which preferentially uses NAD as a cofactor, was studied since NADP-ME has not been found in the genomes of the diatoms that have been sequenced so far (Kroth *et al.*, 2008). Indeed, the very low activity of NADP-ME that we measured (data not shown) is in agreement with the absence of this enzyme. Three diatoms had PEPC activity that was higher at 400 compared to 20 000 ppm, namely *T. weissflogii*, *As. formosa*, and *N. pelliculosa* grown in freshwater. However, in *T. weissflogii*, although PEPC increased at low CO<sub>2</sub>, the ratio of PEPC:Rubisco was less than 1, PPDK was unaffected by CO<sub>2</sub>, and NAD-ME activity was higher at high vs low CO<sub>2</sub>. Overall, there is no strong evidence for C<sub>4</sub> metabolism for *T. weissflogii* under our experimental conditions. In *P. tricornutum*, PEPC also increased at low CO<sub>2</sub> but the value of the ratio of PEPC:Rubisco, and the unchanged activity of PPDK and NAD-ME, suggest that C<sub>4</sub> metabolism is absent in this diatom, in agreement with other recent work (Haimovich-Dayan *et al.*, 2013; Yang *et al.*, 2016). In this species, our study showed that CA activity increased at low CO<sub>2</sub> but that it was lower than in other species, in agreement with HCO<sub>3</sub><sup>-</sup> transporters playing a major role (Hopkinson *et al.*, 2013). In *As. formosa*, where PEPC activity was also slightly higher in low vs high CO<sub>2</sub>, NAD ME and PPDK were unaffected and the ratio of PEPC:Rubisco was much lower than 1, indicating that this species is unlikely to possess C<sub>4</sub> metabolism. In *N. pelliculosa*, when grown in freshwater, NAD-ME and PEPC activity were slightly higher at low vs high CO<sub>2</sub>,



**Table 4.** Kinetics of carbon uptake for marine and freshwater diatoms grown at different concentrations of CO<sub>2</sub>. Cells grown and tested in freshwater media are indicated by (FW); the pH at which carbon (C) or oxygen exchange (O) was measured is given. K<sub>1/2</sub> DIC, the half-saturation concentration of dissolved inorganic carbon.

| Species                                        | Class & sub-class* | [CO <sub>2</sub> ] (ppm) | pH   | C or O <sub>2</sub> | V <sub>max</sub> (μmol h <sup>-1</sup> mg <sup>-1</sup> Chla) | K <sub>1/2</sub> DIC (μM) | Reference                 |
|------------------------------------------------|--------------------|--------------------------|------|---------------------|---------------------------------------------------------------|---------------------------|---------------------------|
| <b>Cells grown at or below air-equilibrium</b> |                    |                          |      |                     |                                                               |                           |                           |
| <i>Asterionella formosa</i> (FW)               | B-Fr               | 400                      | 7    | O <sub>2</sub>      | 107                                                           | 7                         | This study                |
| <i>Asterionella formosa</i> (FW)               | B-Fr               | 400                      | 8    | O <sub>2</sub>      | 79                                                            | 13                        | This study                |
| <i>Eucampia zodiacus</i>                       | M-Bi               | Air                      | 8    | C                   | 414                                                           | 323                       | Trimborn et al., 2009     |
| <i>Navicula pelliculosa</i>                    | B-Ba               | Air                      | 7.5  | O <sub>2</sub>      | 60                                                            | 13                        | Colman and Rotatore, 1988 |
| <i>Navicula pelliculosa</i> (FW)               | B-Ba               | 400                      | 7    | O <sub>2</sub>      | 191                                                           | 7                         | This study                |
| <i>Navicula pelliculosa</i> (FW)               | B-Ba               | 400                      | 8    | O <sub>2</sub>      | 180                                                           | 11                        | This study                |
| <i>Navicula pelliculosa</i>                    | B-Ba               | 400                      | 7    | O <sub>2</sub>      | 240                                                           | 7                         | This study                |
| <i>Navicula pelliculosa</i>                    | B-Ba               | 400                      | 8    | O <sub>2</sub>      | 190                                                           | 8                         | This study                |
| <i>Nitzschia navis-varingica</i>               | B-Ba               | 59                       | 8    | C                   | 290                                                           | 301                       | Trimborn et al., 2008     |
| <i>Nitzschia palea</i>                         | B-Ba               | 400                      | 8    | O <sub>2</sub>      | 210                                                           | 85                        | Hu and Gao, 2009          |
| <i>Phaeodactylum tricornutum</i>               | B-                 | 36                       | 8    | C                   | 358                                                           | 391                       | Burkhardt et al., 2001    |
| <i>Phaeodactylum tricornutum</i>               | B-                 | 180                      | 8    | C                   | 394                                                           | 574                       | Burkhardt et al., 2001    |
| <i>Phaeodactylum tricornutum</i>               | B-                 | Air                      | 8    | C                   | 340                                                           | 743                       | Burkhardt et al., 2001    |
| <i>Phaeodactylum tricornutum</i>               | B-                 | 400                      | 7    | O <sub>2</sub>      | 150                                                           | 10                        | This study                |
| <i>Phaeodactylum tricornutum</i>               | B-                 | 400                      | 8    | O <sub>2</sub>      | 159                                                           | 15                        | This study                |
| <i>Phaeodactylum tricornutum</i>               | B-                 | 400                      | 8.15 | C                   | 350                                                           | 510                       | Wu et al., 2010           |
| <i>Pseudo-nitzschia multiseriis</i>            | B-Ba               | 243                      | 8    | C                   | 369                                                           | 223                       | Trimborn et al., 2008     |
| <i>Skeletonema costatum</i>                    | M-Th               | 36                       | 8    | C                   | 316                                                           | 17                        | Rost et al., 2003         |
| <i>Skeletonema costatum</i>                    | M-Th               | 180                      | 8    | C                   | 374                                                           | 138                       | Rost et al., 2003         |
| <i>Skeletonema costatum</i>                    | M-Th               | Air                      | 8    | C                   | 353                                                           | 246                       | Rost et al., 2003         |
| <i>Skeletonema costatum</i>                    | M-Th               | 400                      | 8    | C                   | 309                                                           | 265                       | Trimborn et al., 2009     |
| <i>Stellarima stellaris</i>                    | C-Co               | 243                      | 8    | C                   | 264                                                           | 304                       | Trimborn et al., 2009     |
| <i>Thalassionema nitzschioides</i>             | B-Fr               | 400                      | 8    | C                   | 342                                                           | 223                       | Trimborn et al., 2009     |
| <i>Thalassiosira pseudonana</i>                | M-Th               | 50                       | 7    | O <sub>2</sub>      | 156                                                           | 13.3                      | Clement et al., 2016      |
| <i>Thalassiosira pseudonana</i>                | M-Th               | 400                      | 7    | O <sub>2</sub>      | 111                                                           | 4                         | Clement et al., 2016      |
| <i>Thalassiosira pseudonana</i>                | M-Th               | 400                      | 8    | O <sub>2</sub>      | 113                                                           | 15                        | Clement et al., 2016      |
| <i>Thalassiosira pseudonana</i>                | M-Th               | Air                      | 8.2  | O <sub>2</sub>      | 180                                                           | 15                        | Nakajima et al., 2013     |
| <i>Thalassiosira pseudonana</i>                | M-Th               | Air                      | 8.2  | O <sub>2</sub>      | 227                                                           | 101                       | Tanaka et al., 2014       |
| <i>Thalassiosira pseudonana</i>                | M-Th               | Air                      | 8    | C                   | 484                                                           | 513                       | Trimborn et al., 2008     |
| <i>Thalassiosira pseudonana</i>                | M-Th               | Air                      | 8.2  | C                   | 535                                                           | 276                       | Yang and Gao, 2012        |
| <i>Thalassiosira weissflogii</i>               | M-Th               | 36                       | 8    | C                   | 188                                                           | 104                       | Burkhardt et al., 2001    |
| <i>Thalassiosira weissflogii</i>               | M-Th               | 180                      | 8    | C                   | 251                                                           | 196                       | Burkhardt et al., 2001    |
| <i>Thalassiosira weissflogii</i>               | M-Th               | Air                      | 8    | C                   | 242                                                           | 391                       | Burkhardt et al., 2001    |
| <i>Thalassiosira weissflogii</i>               | M-Th               | 400                      | 7    | O <sub>2</sub>      | 127                                                           | 3                         | This study                |
| <i>Thalassiosira weissflogii</i>               | M-Th               | 400                      | 8    | O <sub>2</sub>      | 111                                                           | 7                         | This study                |
| <b>Cells grown above air-equilibrium</b>       |                    |                          |      |                     |                                                               |                           |                           |
| <i>Asterionella formosa</i> (FW)               | B-Fr               | 20 000                   | 7    | O <sub>2</sub>      | 337                                                           | 55                        | This study                |
| <i>Asterionella formosa</i> (FW)               | B-Fr               | 20 000                   | 8    | O <sub>2</sub>      | 159                                                           | 106                       | This study                |
| <i>Eucampia zodiacus</i>                       | M-Bi               | 800                      | 8    | C                   | 450                                                           | 411                       | Trimborn et al., 2009     |
| <i>Navicula pelliculosa</i> (FW)               | B-Ba               | 20 000                   | 7    | O <sub>2</sub>      | 246                                                           | 57                        | This study                |
| <i>Navicula pelliculosa</i> (FW)               | B-Ba               | 20 000                   | 8    | O <sub>2</sub>      | 195                                                           | 26                        | This study                |
| <i>Navicula pelliculosa</i>                    | B-Ba               | 20 000                   | 7    | O <sub>2</sub>      | 136                                                           | 22                        | This study                |
| <i>Navicula pelliculosa</i>                    | B-Ba               | 20 000                   | 8    | O <sub>2</sub>      | 123                                                           | 64                        | This study                |
| <i>Nitzschia navis-varingica</i>               | B-Ba               | 819                      | 8    | C                   | 261                                                           | 494                       | Trimborn et al., 2008     |
| <i>Nitzschia palea</i>                         | B-Ba               | 700                      | 8    | O <sub>2</sub>      | 125                                                           | 101                       | Hu and Gao, 2009          |
| <i>Phaeodactylum tricornutum</i>               | B-                 | 1800                     | 8    | C                   | 407                                                           | 1174                      | Burkhardt et al., 2001    |
| <i>Phaeodactylum tricornutum</i>               | B-                 | 20 000                   | 7    | O <sub>2</sub>      | 235                                                           | 35                        | This study                |
| <i>Phaeodactylum tricornutum</i>               | B-                 | 20 000                   | 8    | O <sub>2</sub>      | 199                                                           | 279                       | This study                |
| <i>Phaeodactylum tricornutum</i>               | B-                 | 1000                     | 8.15 | C                   | 370                                                           | 610                       | Wu et al., 2010           |
| <i>Pseudo-nitzschia multiseriis</i>            | B-Ba               | 819                      | 8    | C                   | 368                                                           | 327                       | Trimborn et al., 2008     |
| <i>Skeletonema costatum</i>                    | M-Th               | 1800                     | 8    | C                   | 347                                                           | 505                       | Rost et al., 2003         |
| <i>Skeletonema costatum</i>                    | M-Th               | 800                      | 8    | C                   | 371                                                           | 441                       | Trimborn et al., 2009     |
| <i>Stellarima stellaris</i>                    | C-Co               | 819                      | 8    | C                   | 258                                                           | 572                       | Trimborn et al., 2008     |
| <i>Thalassionema nitzschioides</i>             | B-Fr               | 800                      | 8    | C                   | 364                                                           | 379                       | Trimborn et al., 2009     |



Table 4. Continued

| Species                          | Class & sub-class* | [CO <sub>2</sub> ] (ppm) | pH  | C or O <sub>2</sub> | V <sub>max</sub> (μmol h <sup>-1</sup> mg <sup>-1</sup> Chla) | K <sub>1/2</sub> DIC (μM) | Reference                       |
|----------------------------------|--------------------|--------------------------|-----|---------------------|---------------------------------------------------------------|---------------------------|---------------------------------|
| <i>Thalassiosira pseudonana</i>  | M-Th               | 20 000                   | 7   | O <sub>2</sub>      | 205                                                           | 59                        | Clement <i>et al.</i> , 2016    |
| <i>Thalassiosira pseudonana</i>  | M-Th               | 20 000                   | 8   | O <sub>2</sub>      | 95                                                            | 46                        | Clement <i>et al.</i> , 2016)   |
| <i>Thalassiosira pseudonana</i>  | M-Th               | 50000                    | 8.2 | O <sub>2</sub>      | 179                                                           | 515                       | Nakajima <i>et al.</i> , 2013)  |
| <i>Thalassiosira pseudonana</i>  | M-Th               | 800                      | 8   | C                   | 470                                                           | 443                       | Trimbom <i>et al.</i> , 2008)   |
| <i>Thalassiosira pseudonana</i>  | M-Th               | 1000                     | 8.2 | C                   | 497                                                           | 402                       | Yang and Gao, 2012)             |
| <i>Thalassiosira weissflogii</i> | M-Th               | 1800                     | 8   | C                   | 260                                                           | 509                       | Burkhardt <i>et al.</i> , 2001) |
| <i>Thalassiosira weissflogii</i> | M-Th               | 20 000                   | 7   | O <sub>2</sub>      | 122                                                           | 20                        | This study                      |
| <i>Thalassiosira weissflogii</i> | M-Th               | 20 000                   | 8   | O <sub>2</sub>      | 106                                                           | 105                       | This study                      |

\* Taxonomic position follows AlgaeBase ([www.algaebase.org](http://www.algaebase.org); searched on 9 January 2017). Class: B, Bacillariophyceae; C, Coscinodiscophyceae; M, Mediophyceae. Sub-class: Ba, Bacillariophycidae; Bi, Biddulphiophycidae; Co, Coscinodiscophycidae; Fr, Fragilariophycidae; Th, Thalassiosirophycidae. The precise taxonomic position of *Phaeodactylum tricorutum* is uncertain.

and the ratio of PEPC:Rubisco was slightly above 1; more work is therefore required to confirm if this diatom can use a C<sub>4</sub> metabolism. Lastly, in the well-studied diatom *T. pseudonana*, the presence of this photosynthesis type seems to be absent (Roberts *et al.*, 2007; Tanaka *et al.*, 2014; Clement *et al.*, 2016), although this has been controversial (McGinn and Morel, 2008a; Kustka *et al.*, 2014).

As shown previously in *T. pseudonana* and in all the species studied here, Rubisco activity decreased at low vs high CO<sub>2</sub> concentration (Clement *et al.*, 2016), consistent with down-regulating carboxylation capacity under carbon shortage. These results are in good agreement with data showing that Rubisco concentration was higher at 750 ppm than at 390 ppm CO<sub>2</sub> in *Emiliania huxleyi* and *T. pseudonana* (McCarthy *et al.*, 2012). It is, however, in contrast with data obtained for *T. weissflogii* comparing 750 to 396 and 182 ppm CO<sub>2</sub>, where Rubisco concentration decreased at the highest CO<sub>2</sub> concentration (Losh *et al.*, 2013). While this study suggested that an increase in the rate of carbon fixation per unit of enzyme as external CO<sub>2</sub> increases would make it possible to reduce the Rubisco content while maintaining constant rates of carbon fixation and growth, our results suggest that while CCM is down-regulated at high CO<sub>2</sub>, Rubisco activity is up-regulated.

To conclude, our work provides no compelling evidence that C<sub>4</sub> photosynthesis is present in any of the diatom species tested. In contrast, CA and active uptake of HCO<sub>3</sub><sup>-</sup> are clearly widespread and important components of diatom CCMs. There is large variation among diatoms in their reliance on CO<sub>2</sub> or HCO<sub>3</sub><sup>-</sup> as an inorganic carbon source and in the type and effectiveness of their CCMs, but in the few species studied there are no clear differences between marine and freshwater species, despite the differences in carbon availability between the two environments.

## Acknowledgements

RC's studentship was supported by the Ministère de l'Éducation Nationale, de la Recherche et de la Technologie (MENRT). EJ's studentship is supported by the Comisión Nacional de Investigación Científica y Tecnológica (CONICYT), Chile CONYCIT, and LP is currently supported by the A\*MIDEX project (n° ANR-11-IDEX-0001-02) funded by the «Investissements d'Avenir» French Government program, managed by the French National Research Agency (ANR). BG's group is supported by

the Centre National de la Recherche Scientifique, Aix-Marseille Université, A\*MIDEX project (No. ANR-11-IDEX-0001-02), Agence Nationale de la Recherche (Signaux-BioNRJ, ANR-15-CE05-0021-03), the Region PACA and IBI SA. SM's work is supported by the UK Natural Environment Research Council and a visiting scholarship from Aix-Marseille Université. The authors thank Ahmed Zellat for technical support in maintaining the algal cultures.

## References

- Anderson LE. 1971. Chloroplast and cytoplasmic enzymes. II. Pea leaf triose phosphate isomerases. *Biochimica et Biophysica Acta* **235**, 237–244.
- Armbrust EV. 2009. The life of diatoms in the world's oceans. *Nature* **459**, 185–192.
- Badger MR, Andrews TJ, Whitney SM, Ludwig M, Yellowlees DC, Leggat W, Price GD. 1998. The diversity and coevolution of Rubisco, plastids, pyrenoids, and chloroplast-based CO<sub>2</sub>-concentrating mechanisms in algae. *Canadian Journal of Botany* **76**, 1052–1071.
- Badger MR, Price GD, Long BM, Woodger FJ. 2006. The environmental plasticity and ecological genomics of the cyanobacterial CO<sub>2</sub> concentrating mechanism. *Journal of Experimental Botany* **57**, 249–265.
- Bowes G, Ogren WL, Hageman RH. 1971. Phosphoglycolate production catalyzed by ribulose diphosphate carboxylase. *Biochemical and Biophysical Research Communications* **45**, 716–722.
- Burkhardt S, Amoroso G, Riebesell U, Sültemeyer D. 2001. CO<sub>2</sub> and HCO<sub>3</sub><sup>-</sup> uptake in marine diatoms acclimated to different CO<sub>2</sub> concentrations. *Limnology and Oceanography* **46**, 1378–1391.
- Casati P, Lara MV, Andreo CS. 2000. Induction of a C<sub>4</sub>-like mechanism of CO<sub>2</sub> fixation in *Egeria densa*, a submersed aquatic species. *Plant Physiology* **123**, 1611–1622.
- Chiu SY, Kao CY, Tsai MT, Ong SC, Chen CH, Lin CS. 2009. Lipid accumulation and CO<sub>2</sub> utilization of *Nannochloropsis oculata* in response to CO<sub>2</sub> aeration. *Bioresource Technology* **100**, 833–838.
- Clement R, Dimnet L, Maberly SC, Gontero B. 2016. The nature of the CO<sub>2</sub>-concentrating mechanisms in a marine diatom, *Thalassiosira pseudonana*. *The New Phytologist* **209**, 1417–1427.
- Colman B, Rotatore C. 1988. Uptake and accumulation of inorganic carbon by a freshwater diatom. *Journal of Experimental Botany* **39**, 1025–1032.
- Crawford KJ, Raven JA, Wheeler GL, Baxter EJ, Joint I. 2011. The response of *Thalassiosira pseudonana* to long-term exposure to increased CO<sub>2</sub> and decreased pH. *PLoS ONE* **6**, e26695.
- Douce R, Heldt H-W. 2000. Photorespiration. In: Leegood RC, Sharkey TD, Caemmerer S, eds. *Photosynthesis: physiology and metabolism*. Dordrecht: Springer Netherlands, 115–136.
- Ellwood MJ, Hunter KA. 2000. The incorporation of zinc and iron into the frustule of the marine diatom *Thalassiosira pseudonana*. *Limnology and Oceanography* **45**, 1517–1524.
- Erales J, Gontero B, Maberly SC. 2008. Specificity and function of glyceraldehyde-3-phosphate dehydrogenase in a freshwater diatom,

- Asterionella formosa* (Bacillariophyceae). *Journal of Phycology* **44**, 1455–1464.
- Falkowski PG, Katz ME, Knoll AH, Quigg A, Raven JA, Schofield O, Taylor FJR.** 2004. The evolution of modern eukaryotic phytoplankton. *Science* **305**, 354–360.
- Falkowski PG, Laws E, Barber R, Murray J.** 2003. Phytoplankton and their role in primary, new, and export production. In: *Fasham MR*, ed. *Ocean biogeochemistry*. Heidelberg: Springer Berlin, 99–121.
- Freitag H, Stichler W.** 2002. *Bienertia cycloptera* Bunge ex Boiss., Chenopodiaceae, another C<sub>4</sub> plant without Kranz tissues. *Plant Biology* **4**, 121–132.
- Giordano M, Beardall J, Raven JA.** 2005. CO<sub>2</sub> concentrating mechanisms in algae: mechanisms, environmental modulation, and evolution. *Annual Review of Plant Biology* **56**, 99–131.
- Haimovich-Dayan M, Garfinkel N, Ewe D, Marcus Y, Gruber A, Wagner H, Kroth PG, Kaplan A.** 2013. The role of C<sub>4</sub> metabolism in the marine diatom *Phaeodactylum tricornutum*. *The New Phytologist* **197**, 177–185.
- Harada H, Nakatsuma D, Ishida M, Matsuda Y.** 2005. Regulation of the expression of intracellular beta-carbonic anhydrase in response to CO<sub>2</sub> and light in the marine diatom *Phaeodactylum tricornutum*. *Plant Physiology* **139**, 1041–1050.
- Hofmann GE, Smith JE, Johnson KS, et al.** 2011. High-frequency dynamics of ocean pH: a multi-ecosystem comparison. *PLoS ONE* **6**, e28983.
- Hopkinson BM, Dupont CL, Matsuda Y.** 2016. The physiology and genetics of CO<sub>2</sub> concentrating mechanisms in model diatoms. *Current Opinion in Plant Biology* **31**, 51–57.
- Hopkinson BM, Meile C, Shen C.** 2013. Quantification of extracellular carbonic anhydrase activity in two marine diatoms and investigation of its role. *Plant Physiology* **162**, 1142–1152.
- Hu H, Gao K.** 2009. Impacts of CO<sub>2</sub> enrichment on growth and photosynthesis in freshwater and marine diatoms. *Chinese Journal of Oceanology and Limnology* **26**, 407–414.
- Katz ME, Wright JD, Miller KG, Cramer BS, Fennel K, Falkowski PG.** 2005. Biological overprint of the geological carbon cycle. *Marine Geology* **217**, 323–338.
- Kroth PG, Chiovitti A, Gruber A, et al.** 2008. A model for carbohydrate metabolism in the diatom *Phaeodactylum tricornutum* deduced from comparative whole genome analysis. *PLoS ONE* **3**, e1426.
- Kustka AB, Milligan AJ, Zheng H, New AM, Gates C, Bidle KD, Reinfelder JR.** 2014. Low CO<sub>2</sub> results in a rearrangement of carbon metabolism to support C<sub>4</sub> photosynthetic carbon assimilation in *Thalassiosira pseudonana*. *The New Phytologist* **204**, 507–520.
- Lara MV, Casati P, Andreo CS.** 2002. CO<sub>2</sub>-concentrating mechanisms in *Egeria densa*, a submersed aquatic plant. *Physiologia Plantarum* **115**, 487–495.
- Levitán O, Rosenberg G, Setlik I, Setlikova E, Grigel J, Klepetar J, Prasil O, Berman-Frank I.** 2007. Elevated CO<sub>2</sub> enhances nitrogen fixation and growth in the marine cyanobacterium *Trichodesmium*. *Global Change Biology* **13**, 531–538.
- Losh JL, Young JN, Morel FM.** 2013. Rubisco is a small fraction of total protein in marine phytoplankton. *The New Phytologist* **198**, 52–58.
- Maberly SC.** 1996. Diel, episodic and seasonal changes in pH and concentrations of inorganic carbon in a productive lake. *Freshwater Biology* **35**, 579–598.
- Maberly SC, Berthelot SA, Stott AW, Gontero B.** 2015. Adaptation by macrophytes to inorganic carbon down a river with naturally variable concentrations of CO<sub>2</sub>. *Journal of Plant Physiology* **172**, 120–127.
- Maberly SC, Spence DHN.** 1983. Photosynthetic inorganic carbon use by fresh-water plants. *Journal of Ecology* **71**, 705–724.
- Magnin NC, Cooley BA, Reiskind JB, Bowes G.** 1997. Regulation and localization of key enzymes during the induction of Kranz-less, C<sub>4</sub>-type photosynthesis in *Hydrilla verticillata*. *Plant Physiology* **115**, 1681–1689.
- Malviya S, Scalco E, Audic S, et al.** 2016. Insights into global diatom distribution and diversity in the world's ocean. *Proceedings of the National Academy of Sciences, USA* **113**, E1516–E1525.
- Matsuda Y, Nakajima K, Tachibana M.** 2011. Recent progresses on the genetic basis of the regulation of CO<sub>2</sub> acquisition systems in response to CO<sub>2</sub> concentration. *Photosynthesis Research* **109**, 191–203.
- McCarthy A, Rogers SP, Duffy SJ, Campbell DA.** 2012. Elevated carbon dioxide differentially alters the photophysiology of *Thalassiosira pseudonana* (Bacillariophyceae) and *Emiliania huxleyi* (Haptophyta). *Journal of Phycology* **48**, 635–646.
- McGinn PJ, Morel FM.** 2008a. Expression and inhibition of the carboxylating and decarboxylating enzymes in the photosynthetic C<sub>4</sub> pathway of marine diatoms. *Plant Physiology* **146**, 300–309.
- McGinn PJ, Morel FM.** 2008b. Expression and regulation of carbonic anhydrases in the marine diatom *Thalassiosira pseudonana* and in natural phytoplankton assemblages from Great Bay, New Jersey. *Physiologia Plantarum* **133**, 78–91.
- Medlin LK.** 2016. Evolution of the diatoms: major steps in their evolution and a review of the supporting molecular and morphological evidence. *Phycologia* **55**, 79–103.
- Mekhalfi M, Amara S, Robert S, Carrière F, Gontero B.** 2014a. Effect of environmental conditions on various enzyme activities and triacylglycerol contents in cultures of the freshwater diatom, *Asterionella formosa* (Bacillariophyceae). *Biochimie* **101**, 21–30.
- Mekhalfi M, Avilan L, Lebrun R, Botbol H, Gontero B.** 2012. Consequences of the presence of 24-epibrassinolide, on cultures of a diatom, *Asterionella formosa*. *Biochimie* **94**, 1213–1220.
- Mekhalfi M, Puppo C, Avilan L, Lebrun R, Mansuelle P, Maberly SC, Gontero B.** 2014b. Glyceraldehyde-3-phosphate dehydrogenase is regulated by ferredoxin-NADP reductase in the diatom *Asterionella formosa*. *The New Phytologist* **203**, 414–423.
- Milligan AJ, Morel FMM.** 2002. A proton buffering role for silica in diatoms. *Science* **297**, 1848–1850.
- Mus F, Toussaint JP, Cooksey KE, Fields MW, Gerlach R, Peyton BM, Carlson RP.** 2013. Physiological and molecular analysis of carbon source supplementation and pH stress-induced lipid accumulation in the marine diatom *Phaeodactylum tricornutum*. *Applied Microbiology and Biotechnology* **97**, 3625–3642.
- Nakajima K, Tanaka A, Matsuda Y.** 2013. SLC4 family transporters in a marine diatom directly pump bicarbonate from seawater. *Proceedings of the National Academy of Sciences, USA* **110**, 1767–1772.
- Nimer NA, Warren M, Merrett MJ.** 1998. The regulation of photosynthetic rate and activation of extracellular carbonic anhydrase under CO<sub>2</sub>-limiting conditions in the marine diatom *Skeletonema costatum*. *Plant, Cell & Environment* **21**, 805–812.
- Ogren WL.** 1984. Photorespiration: pathways, regulation, and modification. *Annual Review of Plant Physiology* **35**, 415–442.
- Patel BN, Merrett MJ.** 1986. Inorganic-carbon uptake by the marine diatom *Phaeodactylum tricornutum*. *Planta* **169**, 222–227.
- Price GD, Coleman JR, Badger MR.** 1992. Association of carbonic anhydrase activity with carboxysomes isolated from the cyanobacterium *Synechococcus* PCC7942. *Plant Physiology* **100**, 784–793.
- Prioretti L, Lebrun R, Gontero B, Giordano M.** 2016. Redox regulation of ATP sulfurylase in microalgae. *Biochemical and Biophysical Research Communications* **478**, 1555–1562.
- Raven JA.** 2010. Inorganic carbon acquisition by eukaryotic algae: four current questions. *Photosynthesis Research* **106**, 123–134.
- Raven JA, Maberly SC.** 2004. Plant productivity of inland waters. In: Papageorgiou GC, Govindjee, eds. *Chlorophyll a fluorescence: a signature of photosynthesis*. Dordrecht: Springer Netherlands, 779–793.
- Raven JA, Waite AM.** 2004. The evolution of silicification in diatoms: inescapable sinking and sinking as escape? *New Phytologist* **162**, 45–61.
- Reinfelder JR, Kraepiel AM, Morel FM.** 2000. Unicellular C<sub>4</sub> photosynthesis in a marine diatom. *Nature* **407**, 996–999.
- Reinfelder JR, Milligan AJ, Morel FM.** 2004. The role of the C<sub>4</sub> pathway in carbon accumulation and fixation in a marine diatom. *Plant Physiology* **135**, 2106–2111.
- Reiskind JB, Bowes G.** 1991. The role of phosphoenolpyruvate carboxykinase in a marine macroalga with C<sub>4</sub>-like photosynthetic characteristics. *Proceedings of the National Academy of Sciences, USA* **88**, 2883–2887.
- Roberts K, Granum E, Leegood RC, Raven JA.** 2007. C<sub>3</sub> and C<sub>4</sub> pathways of photosynthetic carbon assimilation in marine diatoms are under genetic, not environmental, control. *Plant Physiology* **145**, 230–235.

- Rost B, Riebesell U, Burkhardt S, Sültemeyer D.** 2003. Carbon acquisition of bloom-forming marine phytoplankton. *Limnology and Oceanography* **48**, 55–67.
- Sage RF.** 2004. The evolution of C4 photosynthesis. *New Phytologist* **161**, 341–370.
- Samukawa M, Shen C, Hopkinson BM, Matsuda Y.** 2014. Localization of putative carbonic anhydrases in the marine diatom, *Thalassiosira pseudonana*. *Photosynthesis Research* **121**, 235–249.
- Sharkey TD.** 1988. Estimating the rate of photorespiration in leaves. *Physiologia Plantarum* **73**, 147–152.
- Smith EJ, Davison W, Hamilton-Taylor J.** 2002. Methods for preparing synthetic freshwaters. *Water Research* **36**, 1286–1296.
- Sorhannus U.** 2007. A nuclear-encoded small-subunit ribosomal RNA timescale for diatom evolution. *Marine Micropaleontology* **65**, 1–12.
- Tachibana M, Allen AE, Kikutani S, Endo Y, Bowler C, Matsuda Y.** 2011. Localization of putative carbonic anhydrases in two marine diatoms, *Phaeodactylum tricorutum* and *Thalassiosira pseudonana*. *Photosynthesis Research* **109**, 205–221.
- Taddei L, Stella GR, Rogato A, et al.** 2016. Multisignal control of expression of the LHCX protein family in the marine diatom *Phaeodactylum tricorutum*. *Journal of Experimental Botany* **67**, 3939–3951.
- Talling JF.** 1976. The depletion of carbon dioxide from lake water by phytoplankton. *Journal of Ecology* **64**, 79–121.
- Tanaka R, Kikutani S, Mahardika A, Matsuda Y.** 2014. Localization of enzymes relating to C4 organic acid metabolisms in the marine diatom, *Thalassiosira pseudonana*. *Photosynthesis Research* **121**, 251–263.
- Tanaka Y, Nakatsuma D, Harada H, Ishida M, Matsuda Y.** 2005. Localization of soluble beta-carbonic anhydrase in the marine diatom *Phaeodactylum tricorutum*. Sorting to the chloroplast and cluster formation on the girdle lamellae. *Plant Physiology* **138**, 207–217.
- Tortell PD.** 2000. Evolutionary and ecological perspectives on carbon acquisition in phytoplankton. *Limnology and Oceanography* **45**, 744–750.
- Trimborn S, Lundholm N, Thoms S, Richter KU, Krock B, Hansen PJ, Rost B.** 2008. Inorganic carbon acquisition in potentially toxic and non-toxic diatoms: the effect of pH-induced changes in seawater carbonate chemistry. *Physiologia Plantarum* **133**, 92–105.
- Trimborn S, Wolf-Gladrow D, Richter K-U, Rost B.** 2009. The effect of pCO<sub>2</sub> on carbon acquisition and intracellular assimilation in four marine diatoms. *Journal of Experimental Marine Biology and Ecology* **376**, 26–36.
- Tsuzuki M, Ohnuma E, Sato N, Takaku T, Kawaguchi A.** 1990. Effects of CO<sub>2</sub> concentration during growth on fatty acid composition in microalgae. *Plant Physiology* **93**, 851–856.
- Voznesenskaya EV, Franceschi VR, Kiirats O, Artyusheva EG, Freitag H, Edwards GE.** 2002. Proof of C4 photosynthesis without Kranz anatomy in *Bienertia cycloptera* (Chenopodiaceae). *The Plant Journal* **31**, 649–662.
- Voznesenskaya EV, Franceschi VR, Kiirats O, Freitag H, Edwards GE.** 2001. Kranz anatomy is not essential for terrestrial C4 plant photosynthesis. *Nature* **414**, 543–546.
- Wang XW, Liang JR, Luo CS, Chen CP, Gao YH.** 2014. Biomass, total lipid production, and fatty acid composition of the marine diatom *Chaetoceros muelleri* in response to different CO<sub>2</sub> levels. *Bioresource Technology* **161**, 124–130.
- Wu Y, Gao K, Riebesell U.** 2010. CO<sub>2</sub>-induced seawater acidification affects physiological performance of the marine diatom *Phaeodactylum tricorutum*. *Biogeosciences* **7**, 2915–2923.
- Yang G, Gao K.** 2012. Physiological responses of the marine diatom *Thalassiosira pseudonana* to increased pCO<sub>2</sub> and seawater acidity. *Marine Environmental Research* **79**, 142–151.
- Yang J, Pan Y, Bowler C, Zhang L, Hu H.** 2016. Knockdown of phosphoenolpyruvate carboxykinase increases carbon flux to lipid synthesis in *Phaeodactylum tricorutum*. *Algal Research* **15**, 50–58.
- Young JN, Heureux AM, Sharwood RE, Rickaby RE, Morel FM, Whitney SM.** 2016. Large variation in the Rubisco kinetics of diatoms reveals diversity among their carbon-concentrating mechanisms. *Journal of Experimental Botany* **67**, 3445–3456.
- Zhang Y, Yin L, Jiang HS, Li W, Gontero B, Maberly SC.** 2014. Biochemical and biophysical CO<sub>2</sub> concentrating mechanisms in two species of freshwater macrophyte within the genus *Ottelia* (Hydrocharitaceae). *Photosynthesis Research* **121**, 285–297.
